# Supplementary material for: Fast Census of Moth Diversity in the Neotropics: A Comparison of Field-Assigned Morphospecies and DNA Barcoding in Tiger Moths
Source: PLoS One. 2016 Feb 9;11(2):e0148423. doi: 10.1371/journal.pone.0148423 (PMC4747490; doi:10.1371/journal.pone.0148423)
Supplement: S1 Appendix — For a description of species delimitation methods see Material and Methods section. Cells with colors of different shades are used to separate BINs. Cells in different shades of green: matching results between all five species delimitation methods; Blue cells: conflicting results between the ABGD method and the remaining approaches. Cells in different shades of yellow: matching results between the molecular approaches (BINs, 2% threshold and ABGD) and the MRA species delimitation method but neither the molecular nor the MRA approaches corresponded to the IMA species delimitation method. Cells in different shades of purple: matching results between BINs and MRA species delimitation method, but conflicting results between these two methods and the remaining approaches (IMA, 2% threshold and ABGD). Cells in different shades of red: conflicting result between the molecular species delimitation methods and the remaining approaches. IMA and MRA species delimitation methods may or may not correspond to each other (see rearrangements into MRA species). Cells in different shades of brown: conflicting results between BINs and the remaining molecular species delimitation methods. IMA and MRA species delimitation methods may or may not correspond to each other (see rearrangements into MRA species). The species names may differ because taxonomy was improved after the morphological reassessment (see Material and Methods section). (XLSX) [file pone.0148423.s001.xlsx]

## Sheet: Plan2
IMA species	BINs	Rearengements into MRA species	MRA species	MOTUs (2% threshold)	MOTUs (ABGD approach)
Aclytia punctata	BOLD:AAP4061	No	Aclytia punctata	MOTU001	MOTU000
Agylla sp. JAT01	BOLD:ACE8856	No	Agylla argentifera	MOTU002	MOTU002
Agylla sp. JAT03	BOLD:AAH2585	No	Agylla sp. JAT02	MOTU003	MOTU003
Agylla sp. JAT04	BOLD:ACH0774	No	Agylla nivea	MOTU004	MOTU004
Agylla sp. JAT06	BOLD:AAU0907	No	Agylla marcata	MOTU005	MOTU005
Agylla sp. JAT09	BOLD:AAU0906	No	Agylla separata	MOTU006	MOTU006
Agylla sp. JAT10	BOLD:ABA3463	No	Agylla sp. JAT03	MOTU007	MOTU007
Agylla sp. JAT11	BOLD:ABA2560	No	Agylla sp. JAT04	MOTU008	MOTU008
Agylla sp. JAT12	BOLD:ABA2559	No	Agylla sp. JAT05	MOTU009	MOTU009
Agylla sp. JAT14	BOLD:ABV8243	No	Agylla sp. JAT06	MOTU010	MOTU010
Agylla sp. ML17	BOLD:ABV9613	No	Agylla sp. ML07	MOTU011	MOTU011
Agyrta albisparsa	BOLD:AAP3822	No	Agyrta albisparsa	MOTU012	MOTU012
Amaxia corata	BOLD:AAP5455	No	Amaxia corata	MOTU013	MOTU013
Amaxia hebe	BOLD:AAP4861	No	Amaxia hebe	MOTU014	MOTU014
Ammalo helops	BOLD:ABY7692	No	Ammalo helops	MOTU015	MOTU015
Aphyle abdominalis	BOLD:AAW9507	No	Aphyle abdominalis	MOTU016	MOTU016
Apistosia judas	BOLD:AAD9238	No	Apistosia judas	MOTU017	MOTU017
Arctiinae sp. JAT02	BOLD:ABV3942	No	Arctiinae sp. JAT01	MOTU018	MOTU019
Arctiinae sp. JAT04	BOLD:ABV4827	No	Eucereon pittieri	MOTU019	MOTU020
Arctiinae sp. JAT05	BOLD:ABV9584	No	Arctiinae sp. JAT02	MOTU020	MOTU021
Arctiinae sp. JAT06	BOLD:AAL1131	No	Arctiinae sp. JAT03	MOTU021	MOTU022
Arctiinae sp. JAT08	BOLD:AAZ4179	No	Arctiinae sp. JAT05	MOTU022	MOTU023
Arctiinae sp. JAT09	BOLD:ACF1201	No	Pheia catherina	MOTU023	MOTU024
Arctiinae sp. JAT10	BOLD:AAY2593	No	Andrenimorpha xanthogastra	MOTU024	MOTU025
Arctiinae sp. JAT11	BOLD:ABV4828	No	Arctiinae sp. JAT06	MOTU025	MOTU026
Arctiinae sp. JAT12	BOLD:ABV3958	No	Arctiinae sp. JAT07	MOTU026	MOTU027
Arctiinae sp. JAT14	BOLD:AAP4148	No	Arctiinae sp. JAT09	MOTU027	MOTU028
Arctiinae sp. JAT15	BOLD:ABV8211	No	Arctiinae sp. JAT10	MOTU028	MOTU029
Arctiinae sp. JAT16	BOLD:AAV4267	No	Elysius ordinarius	MOTU029	MOTU030
Arctiinae sp. JAT17	BOLD:ABU5768	No	Pelochyta pallida	MOTU030	MOTU031
Arctiinae sp. JAT20	BOLD:AAY6244	No	Arctiinae sp. JAT11	MOTU031	MOTU032
Arctiinae sp. JAT22	BOLD:AAZ2682	No	Symphlebia suanus	MOTU032	MOTU033
Arctiinae sp. JAT23	BOLD:ABU8645	No	Arctiinae sp. JAT12	MOTU033	MOTU034
Arctiinae sp. JAT24	BOLD:AAX5607	No	Arctiinae sp. JAT13	MOTU034	MOTU035
Arctiinae sp. JAT26	BOLD:ABV3724	No	Arctiinae sp. JAT14	MOTU035	MOTU036
Arctiinae sp. JAT29	BOLD:ABV3952	No	Haemaphlebiella strigata	MOTU036	MOTU037
Arctiinae sp. JAT31	BOLD:ABU9679	No	Halysidota sp. VB01	MOTU037	MOTU038
Arctiinae sp. JAT33	BOLD:ABU9645	No	Arctiinae sp. JAT15	MOTU038	MOTU039
Arctiinae sp. JAT35	BOLD:ABV9175	No	Arctiinae sp. JAT16	MOTU039	MOTU040
Arctiinae sp. JAT37	BOLD:AAV9827	No	Agaraea uniformes	MOTU040	MOTU041
Arctiinae sp. JAT38	BOLD:ABU8636	No	Arctiinae sp. JAT17	MOTU041	MOTU042
Arctiinae sp. JAT39	BOLD:AAP3450	No	Eucereon plumbicollum	MOTU042	MOTU043
Argyroeides sanguinea	BOLD:AAZ5029	No	Argyroeides sanguinea	MOTU043	MOTU044
Arhabdosia sp. ML01	BOLD:ABA3693	No	Arhabdosia sp. ML01	MOTU044	MOTU045
Aristodaema hanga	BOLD:AAN1616	No	Aristodaema hanga	MOTU045	MOTU046
Atyphopsis sp. JAT01	BOLD:ABA3288	No	Atyphopsis roseiceps	MOTU046	MOTU047
Baritius acuminata	BOLD:ACF1558	No	Baritius acuminata	MOTU047	MOTU048
Baritius acuminata		No			MOTU049
Bernathonomus piperita	BOLD:ABZ2518	No	Bernathonomus piperita	MOTU048	MOTU050
Bertholdia pseudofumida	BOLD:AAM1586	No	Bertholdia pseudofumida	MOTU049	MOTU051
Bertholdia soror	BOLD:AAV1236	No	Bertholdia soror	MOTU050	MOTU052
Carales astur	BOLD:AAA5097	No	Carales astur	MOTU051	MOTU053
Carathis byblis	BOLD:AAZ3993	No	Carathis byblis	MOTU052	MOTU054
Castrica phalaenoides	BOLD:AAP4177	No	Castrica phalaenoides	MOTU053	MOTU055
Cissura decora	BOLD:ACE3385	No	Cissura decora	MOTU054	MOTU056
Clemensia marmorata	BOLD:ABU6497	No	Clemensia marmorata	MOTU055	MOTU057
Cloesia sp. ML01	BOLD:ACE9509	No	Cloesia sp. ML01	MOTU056	MOTU058
Correbidia lycoides	BOLD:ABX6295	No	Correbidia lycoides	MOTU057	MOTU059
Correbidia sp. JAT02	BOLD:AAZ4975	No	Correbidia sp. JAT01	MOTU058	MOTU060
Cosmosoma centrale	BOLD:AAP3455	No	Cosmosoma centrale	MOTU059	MOTU061
Cosmosoma durca	BOLD:AAU4208	No	Cosmosoma durca	MOTU060	MOTU062
Cosmosoma elegans	BOLD:ABY7362	No	Cosmosoma elegans	MOTU061	MOTU063
Cosmosoma klagesi	BOLD:ABZ0274	No	Cosmosoma klagesi	MOTU062	MOTU064
Cosmosoma leuconoton	BOLD:AAV9100	No	Cosmosoma leuconoton	MOTU063	MOTU065
Cosmosoma plutona	BOLD:AAV7845	No	Cosmosoma plutona	MOTU064	MOTU066
Cosmosoma sp. JAT01	BOLD:AAA1330	No	Cosmosoma cingla	MOTU065	MOTU067
Cosmosoma sp. JAT02	BOLD:AAU2614	No	Cosmosoma sp. JAT01	MOTU066	MOTU068
Cosmosoma sp. JAT03	BOLD:AAZ4974	No	Cosmosoma sp. JAT02	MOTU067	MOTU069
Cosmosoma sp. JAT04	BOLD:ACF2426	No	Ilipa batesi	MOTU068	MOTU070
Cosmosoma teuthras	BOLD:AAA1312	No	Cosmosoma teuthras	MOTU069	MOTU071
Cosmosoma teuthras		No			MOTU072
Cratoplastis catherinae	BOLD:AAF2409	No	Cratoplastis catherinae	MOTU070	MOTU073
Ctenucha jonesi	BOLD:AAZ4973	No	Ctenucha jonesi	MOTU071	MOTU074
Cyanopepla jucunda	BOLD:AAZ4972	No	Cyanopepla jucunda	MOTU072	MOTU075
Delphyre flaviceps	BOLD:AAB4834	No	Delphyre flaviceps	MOTU073	MOTU076
Delphyre hebes	BOLD:ABU6587	No	Delphyre hebes	MOTU074	MOTU077
Delphyre pyroperas	BOLD:AAV9147	No	Delphyre pyroperas	MOTU075	MOTU078
Demolis albicostata	BOLD:AAL1206	No	Demolis albicostata	MOTU076	MOTU080
Dinia sp. JAT01	BOLD:AAX9604	No	Coystea analis	MOTU077	MOTU081
Dycladia lucetius	BOLD:ABY8130	No	Dycladia lucetius	MOTU078	MOTU082
Dysschema fantasma	BOLD:AAN1244	No	Dysschema fantasma	MOTU079	MOTU083
Dysschema lucifer	BOLD:AAF6156	No	Dysschema lucifer	MOTU080	MOTU084
Dysschema neda	BOLD:AAQ3401	No	Dysschema neda	MOTU081	MOTU085
Dysschema sacrifica	BOLD:AAN1243	No	Dysschema sacrifica	MOTU082	MOTU086
Dysschema sp. JAT01	BOLD:AAP4464	No	Dysschema sp. JAT01	MOTU083	MOTU087
Dysschema subapicalis	BOLD:AAZ5018	No	Dysschema subapicalis	MOTU084	MOTU088
Echeta divisa	BOLD:AAZ4751	No	Echeta divisa	MOTU085	MOTU089
Echeta sp. JAT01	BOLD:AAV6469	No	Echeta juno	MOTU086	MOTU090
Elysius cingulata	BOLD:AAV6555	No	Elysius cingulata	MOTU087	MOTU091
Epidesma ursula	BOLD:AAZ3774	No	Epidesma ursula	MOTU088	MOTU094
Episcepsis endodasia	BOLD:AAZ3910	No	Episcepsis endodasia	MOTU089	MOTU095
Episcepsis venata	BOLD:ACE4974	No	Episcepsis venata	MOTU090	MOTU096
Erruca cardinale	BOLD:AAN0221	No	Erruca cardinale	MOTU091	MOTU097
Erruca deyrolii	BOLD:AAP3975	No	Erruca deyrolii	MOTU092	MOTU098
Erruca sanguipuncta	BOLD:AAM5013	No	Erruca sanguipuncta	MOTU093	MOTU099
Euagra sp. JAT01	BOLD:AAX8101	No	Euagra azurea	MOTU094	MOTU100
Euagra sp. JAT02	BOLD:AAX8103	No	Nepe coelestina	MOTU095	MOTU101
Eucereon apicalis	BOLD:AAP4892	No	Eucereon apicalis	MOTU096	MOTU102
Eucereon chalcodon	BOLD:AAZ4070	No	Eucereon chalcodon	MOTU097	MOTU103
Eucereon discolor	BOLD:AAU1399	No	Eucereon discolor	MOTU098	MOTU104
Eucereon griseata	BOLD:AAX7998	No	Eucereon griseata	MOTU099	MOTU105
Eucereon quadricolor	BOLD:AAE1486	No	Eucereon quadricolor	MOTU100	MOTU106
Eucereon setosum	BOLD:AAN5487	No	Eucereon setosum	MOTU101	MOTU107
Eucereon sp. JAT01	BOLD:AAA8661	No	Eucereon aeolum	MOTU102	MOTU108
Eucereon tarona	BOLD:ABU7628	No	Eucereon tarona	MOTU103	MOTU109
Euthyone purpurea	BOLD:ABU6818	No	Euthyone purpurea	MOTU104	MOTU110
Galethalea pica	BOLD:AAN0599	No	Galethalea pica	MOTU105	MOTU111
Graphea paramarmorea	BOLD:ABZ2373	No	Graphea paramarmorea	MOTU106	MOTU112
Haemanota bicolor	BOLD:AAV9826	No	Haemanota bicolor	MOTU107	MOTU113
Heterodontia haematica	BOLD:ABX6421	No	Heterodontia haematica	MOTU108	MOTU114
Holophaea erharda	BOLD:AAZ5106	No	Holophaea erharda	MOTU109	MOTU115
Hyaleucerea vulnerata	BOLD:AAA1380	No	Hyaleucerea vulnerata	MOTU110	MOTU116
Hyalurga fenestra	BOLD:AAP3300	No	Hyalurga fenestrata	MOTU111	MOTU117
Hyalurga sp. JAT01	BOLD:AAV7099	No	Hyalurga sp. JAT01	MOTU112	MOTU118
Hyperandra appendiculata	BOLD:AAG6295	No	Hyperandra appendiculata	MOTU113	MOTU119
Hypercompe sp. JAT01	BOLD:AAZ5109	No	Hypercompe jaguarina	MOTU114	MOTU120
Hypermaepha sp. ML01	BOLD:ABA2866	No	Hypermaepha sp. ML01	MOTU115	MOTU121
Hypidalia enervis	BOLD:ABU6286	No	Hypidalia enervis	MOTU116	MOTU122
Ichoria chalcomedusa	BOLD:AAZ4908	No	Ichoria chalcomedusa	MOTU117	MOTU123
Ichoria tricincta	BOLD:AAP5557	No	Ichoria tricincta	MOTU118	MOTU124
Illice cryptopygra	BOLD:ABU6454	No	Illice cryptopygra	MOTU119	MOTU125
Illice ditrigona	BOLD:ABA3210	No	Illice ditrigona	MOTU120	MOTU126
Illice endoxantha	BOLD:ABA2921	No	Illice endoxantha	MOTU121	MOTU127
Illice sp. ML02	BOLD:ABU6452	No	Illice sp. ML02	MOTU122	MOTU128
Illice sp. ML03	BOLD:ABU6451	No	Illice sp. ML03	MOTU123	MOTU129
Illice sp. ML05	BOLD:ABU6450	No	Illice sp. ML05	MOTU124	MOTU130
Isanthrene incendiaria	BOLD:AAW8800	No	Isanthrene incendiaria	MOTU125	MOTU131
Ischnognatha leucapera	BOLD:ACE9827	No	Ischnognatha leucapera	MOTU126	MOTU132
Isia alcumena	BOLD:AAI8130	No	Isia alcumena	MOTU127	MOTU133
Lepidokirbyia vittipes	BOLD:AAP4190	No	Lepidokirbyia vittipes	MOTU128	MOTU134
Lepidozikania sp. JAT01	BOLD:AAN1972	No	Eucereon ladas	MOTU129	MOTU135
Leucanopsis coniota	BOLD:AAV8068	No	Leucanopsis coniota	MOTU130	MOTU136
Leucanopsis mandus	BOLD:AAP5545	No	Leucanopsis mandus	MOTU131	MOTU138
Leucanopsis oruba	BOLD:AAV8072	No	Leucanopsis oruba	MOTU132	MOTU139
Leucanopsis sp. JAT01	BOLD:ABA2690	No	Leucanopsis sablona	MOTU133	MOTU140
Leucanopsis sp. JAT03	BOLD:AAV8069	No	Leucanopsis biedala	MOTU134	MOTU141
Leucanopsis sp. JAT05	BOLD:ABA2689	No	Leucanopsis bactris	MOTU135	MOTU142
Leucanopsis sp. JAT07	BOLD:AAX4991	No	Leucanopsis romoloa	MOTU136	MOTU143
Lophocampa arpi	BOLD:AAE2881	No	Lophocampa arpi	MOTU137	MOTU144
Mazaeras francki	BOLD:AAF1028	No	Mazaeras francki	MOTU138	MOTU145
Melese sp. JAT02	BOLD:AAM3363	No	Melese peruviana	MOTU139	MOTU147
Melese sp. JAT05	BOLD:AAG1070	No	Melese sp. JAT02	MOTU140	MOTU148
Melese sp. JAT09	BOLD:AAE9215	No	Melese babosa	MOTU141	MOTU149
Melese sp. JAT13	BOLD:AAU1307	No	Melese sp. JAT03	MOTU142	MOTU270
Mirandisca harpalyce	BOLD:AAA1331	No	Mirandisca harpalyce	MOTU143	MOTU150
Napata sp. JAT01	BOLD:AAP3624	No	Callopepla similis	MOTU144	MOTU151
Neidalia dulcicula	BOLD:ABV9691	No	Neidalia dulcicula	MOTU145	MOTU152
Neonerita dorsipuncta	BOLD:AAP4236	No	Neonerita dorsipuncta	MOTU146	MOTU153
Neotrichura nigripes	BOLD:AAN1641	No	Neotrichura nigripes	MOTU147	MOTU154
Nyridela chalciope	BOLD:AAA1414	No	Nyridela chalciope	MOTU148	MOTU155
Ochrodota pronapides	BOLD:AAU3699	No	Ochrodota pronapides	MOTU149	MOTU156
Opharus basalis	BOLD:AAZ3983	No	Opharus basalis	MOTU150	MOTU157
Opharus brasiliensis	BOLD:AAA1442	No	Opharus brasiliensis	MOTU151	MOTU158
Opharus notata	BOLD:AAX0410	No	Opharus notata	MOTU152	MOTU159
Opharus procroides	BOLD:AAF4126	No	Opharus procroides	MOTU153	MOTU160
Opharus rema	BOLD:AAP5515	No	Opharus rema	MOTU154	MOTU161
Ormetica iheringi	BOLD:AAA1432	No	Ormetica iheringi	MOTU155	MOTU162
Ormetica rothschildi	BOLD:ACF3819	No	Ormetica rothschildi	MOTU156	MOTU163
Paracles sp. JAT01	BOLD:AAU1887	No	Paracles paula	MOTU157	MOTU164
Paracles sp. JAT02	BOLD:AAU1889	No	Paracles bilinea	MOTU158	MOTU165
Paracles sp. JAT03	BOLD:ABV5513	No	Paracles azollae	MOTU159	MOTU166
Paracles sp. JAT04	BOLD:ABV5512	No	Paracles sp. JAT01	MOTU160	MOTU167
Paracles variegata	BOLD:AAP5518	No	Paracles variegata	MOTU161	MOTU168
Pareuchaetes sp. ML01	BOLD:AAM8495	No	Pareuchaetes aurata	MOTU162	MOTU169
Pelochyta sp. JAT01	BOLD:AAL3742	No	Pelochyta arontes	MOTU163	MOTU170
Phaegoptera chorima	BOLD:AAQ4027	No	Phaegoptera chorima	MOTU164	MOTU171
Phaegoptera histrionica	BOLD:AAM4813	No	Phaegoptera histrionica	MOTU165	MOTU172
Philoros affinis	BOLD:AAU4333	No	Philoros affinis	MOTU166	MOTU173
Phoenicoprocta haemorrhoidalis	BOLD:AAP4143	No	Phoenicoprocta haemorrhoidalis	MOTU167	MOTU174
Praepiella sesapina	BOLD:AAH2584	No	Praepiella sesapina	MOTU168	MOTU175
Pronola sp. ML01	BOLD:ABA3528	No	Pronola magniplaga	MOTU169	MOTU176
Pseudosphex rubripalpus	BOLD:AAX6916	No	Pseudosphex rubripalpus	MOTU170	MOTU177
Psilopleura sanguipuncta	BOLD:AAX7515	No	Psilopleura sanguipuncta	MOTU171	MOTU178
Psychophasma erosa	BOLD:AAA1341	No	Psychophasma erosa	MOTU172	MOTU179
Rhabdatomis sp. ML01	BOLD:ABA3586	No	Rhabdatomis mandana	MOTU173	MOTU180
Rhipha flavithorax	BOLD:ACE8023	No	Rhipha flavithorax	MOTU174	MOTU181
Rhipha subflammans	BOLD:AAU3667	No	Rhipha subflammans	MOTU175	MOTU182
Rhynchopyga meisteri	BOLD:AAX8633	No	Rhynchopyga meisteri	MOTU176	MOTU183
Robinsonia spitzi	BOLD:AAN0352	No	Robinsonia spitzi	MOTU177	MOTU184
Romualdia elongata	BOLD:AAJ7010	No	Romualdia elongata	MOTU178	MOTU185
Sarosa sp. ML01	BOLD:AAN5475	No	Sarosa pompilina	MOTU179	MOTU186
Sciopsyche tropica	BOLD:AAA1403	No	Sciopsyche tropica	MOTU180	MOTU187
Selenarctia elissa	BOLD:AAG6291	No	Selenarctia elissa	MOTU181	MOTU188
Stenognatha gentilis	BOLD:AAH9893	No	Stenognatha gentilis	MOTU182	MOTU189
Sutonocrea reducta	BOLD:ACF2304	No	Sutonocrea reducta	MOTU183	MOTU190
Sychesia dryas	BOLD:AAU4385	No	Sychesia dryas	MOTU184	MOTU191
Symphlebia lophocampoides	BOLD:ACF0022	No	Symphlebia lophocampoides	MOTU185	MOTU192
Talara semiflava	BOLD:ABA7218	No	Talara semiflava	MOTU186	MOTU193
Talara sp. ML01	BOLD:ABA3362	No	Metalobosia varda	MOTU187	MOTU194
Thysanoprymna pyrrhopyga	BOLD:AAX7988	No	Thysanoprymna pyrrhopyga	MOTU188	MOTU195
Tipulodes ima	BOLD:AAH2615	No	Tipulodes ima	MOTU189	MOTU196
Trichromia sp. JAT05	BOLD:AAU2282	No	Trichromia vulmaria	MOTU190	MOTU197
Tricypha imperialis	BOLD:AAP4323	No	Tricypha imperialis	MOTU191	MOTU198
Tricypha sp. JAT01	BOLD:AAU0933	No	Tricypha nigrescens	MOTU192	MOTU199
Viviennea dolens	BOLD:AAG6287	No	Viviennea dolens	MOTU193	MOTU200
Viviennea moma	BOLD:ACF3919	No	Viviennea moma	MOTU194	MOTU201
Viviennea superba	BOLD:ACE7850	No	Viviennea superba	MOTU195	MOTU202
Xanthophaeina levis	BOLD:AAN0208	No	Xanthophaeina levis	MOTU196	MOTU203
Lycomorphodes sp. ML01	BOLD:ABU7217	Merge	Lycomorphodes strigosa	MOTU197	MOTU265
Lycomorphodes strigosa
Epidesma sp. JAT01	BOLD:AAP4004	Merge	Epidesma sp. JAT01	MOTU198	MOTU232
Epidesma sp. JAT02
Aclytia sp. JAT01	BOLD:AAP4062	Merge	Cercopimorpha dolens	MOTU199	MOTU205
Aclytia sp. JAT02
Eucereon sp. JAT04
Aclytia sp. JAT03	BOLD:AAA1306	Merge	Aclytia heber	MOTU200	MOTU204
Aclytia heber
Agylla polysemata	BOLD:AAU0908	Merge	Agylla argentea	MOTU201	MOTU208
Agylla sp. JAT02
Agylla sp. JAT05
Arctiinae sp. JAT03	BOLD:AAA1423	Merge	Heliura subplena	MOTU202	MOTU235
Eucereon sp. JAT03
Arctiinae sp. JAT18	BOLD:AAV4247	Merge	Leucanopsis fuscosa	MOTU203	MOTU260
Leucanopsis sp. JAT08
Melese sp. JAT01	BOLD:AAC3527	Merge	Melese ocellata	MOTU204	MOTU271
Melese sp. JAT03
Melese sp. JAT04	BOLD:AAV7607	Merge	Melese binotata	MOTU205	MOTU273
Melese sp. JAT11
Arctiinae sp. JAT07	BOLD:AAP3977	Merge	Saurita sp. JAT01	MOTU206	MOTU292
Saurita sp. JAT01
Idalus agastus	BOLD:AAI7688	Mixture	Idalus agastus MMZ01	MOTU207	MOTU245
Idalus agastus	BOLD:AAV6739	Mixture	Idalus agastus MMZ02	MOTU208	MOTU246
Idalus sp. JAT01	BOLD:AAE2619	Mixture	Idalus sp. JAT01	MOTU209	MOTU250
Idalus agastus	BOLD:AAB9083	Mixture	Idalus sp. JAT02	MOTU210	MOTU251
Idalus sp. JAT01
Illice brunnea	BOLD:ABA3208	Mixture	Illice brunnea sp. MMZ01	MOTU211	MOTU252
Illice brunnea	BOLD:ABA3207	Mixture	Illice brunnea sp. MMZ02	MOTU212	MOTU253
Illice sp. ML01
Leucanopsis sp. JAT04	BOLD:AAV8070	Mixture	Leucanopsis pulverea	MOTU213	MOTU258
Leucanopsis sp. JAT06
Arctiinae sp. JAT25	BOLD:ABA2872	Mixture	Leucanopsis joasa	MOTU214	MOTU259
Leucanopsis sp. JAT04
Symphlebia distincta	BOLD:AAU0658	Mixture	Symphlebia distincta sp. MMZ01	MOTU215	MOTU293
Symphlebia distincta	BOLD:AAF3029	Mixture	Symphlebia distincta sp. MMZ02	MOTU216	MOTU294
Symphlebia sp. JAT02
Agylla sp. JAT08	BOLD:AAU1684	Mixture	Agylla sp. JAT01	MOTU217	MOTU209
Agylla sp. JAT13	BOLD:ABV1022	Mixture	Agylla petrola	MOTU218	MOTU211
Correbidia elegans	BOLD:AAI5889	Mixture	Correbidia elegans sp. MMZ01	MOTU219	MOTU224
Correbidia elegans	BOLD:AAP4072	Mixture	Correbidia elegans sp. MMZ02	MOTU220	MOTU225
Correbidia sp. JAT01
Agylla sp. JAT07	BOLD:AAU1685	Mixture	Agylla barbipalpia	MOTU221	MOTU210
Agylla sp. JAT08
Agylla sp. JAT13	BOLD:AAU0909	Mixture	Minitopola braziliensis	MOTU222	MOTU212
Agylla sp. JAT15
Melese castrena	BOLD:AAU0893	Mixture	Melese castrena sp. MMZ01	MOTU223	MOTU268
Melese sp. JAT10
Melese castrena	BOLD:AAU0894	Mixture	Melese castrena sp. MMZ02	MOTU224	MOTU269
Melese sp. JAT08
Melese sp. JAT07	BOLD:AAU1916	Mixture	Melese sp. JAT01	MOTU225	MOTU272
Melese sp. JAT10
Trichromia sp. JAT01	BOLD:AAP5419	Mixture	Trichromia sp. JAT01	MOTU226	MOTU297
Trichromia sp. JAT02
Trichromia sp. JAT01	BOLD:AAV7956	Mixture	Trichromia sp. JAT02	MOTU227	MOTU298
Trichromia sp. JAT02
Trichromia sp. JAT03
Agaraea semivitrea	BOLD:AAP4197	Split	Agaraea semivitrea sp. MMZ01	MOTU228	MOTU206
Agaraea semivitrea	BOLD:AAZ3768	Split	Agaraea semivitrea sp. MMZ02	MOTU229	MOTU207
Arctiinae sp. JAT27	BOLD:ABY4672	Split	Leucanopsis austina	MOTU230	MOTU213
Arctiinae sp. JAT27	BOLD:ABU8360	Split	Arctiinae sp. JAT04	MOTU231	MOTU214
Arctiinae sp. JAT28	BOLD:ABV3959	Split	Arctiinae sp. JAT08	MOTU232	MOTU215
Arctiinae sp. JAT28	BOLD:ABY8571	Split	Leucanopsis strigulosa	MOTU233	MOTU216
Baritius sp. ML01	BOLD:AAU3828	Split	Halysidota sannionis	MOTU234	MOTU222
Baritius sp. ML01	BOLD:AAU3827	Split	Halysidota cyclozonata	MOTU235	MOTU223
Cosmosoma auge	BOLD:AAE4005	Split	Cosmosoma auge sp. MMZ01	MOTU236	MOTU226
Cosmosoma auge	BOLD:ABZ2089	Split	Cosmosoma auge sp. MMZ02	MOTU237	MOTU227
Dysschema hilarina	BOLD:AAI8836	Split	Dysschema hilarina sp. MMZ01	MOTU238	MOTU228
Dysschema hilarina	BOLD:ABV8199	Split	Dysschema hilarina sp. MMZ02	MOTU239	MOTU229
Elysius pyrosticta	BOLD:AAV6553	Split	Elysius pyrosticta sp. MMZ01	MOTU240	MOTU230
Elysius pyrosticta	BOLD:AAF5844	Split	Elysius pyrosticta sp. MMZ02	MOTU241	MOTU231
Eucereon rosa	BOLD:ACJ8235	Split	Eucereon rosa sp. MMZ01	MOTU242	MOTU233
Eucereon rosa	BOLD:AAV7029	Split	Eucereon rosa sp. MMZ02	MOTU243	MOTU234
Euceriodes wernickei	BOLD:AAM5890	Split	Euceriodes wernickei sp. MMZ01	MOTU244	MOTU238
Euceriodes wernickei	BOLD:AAP4489	Split	Euceriodes wernickei sp. MMZ02	MOTU245	MOTU239
Euceriodes wernickei	BOLD:AAO5436	Split	Euceriodes wernickei sp. MMZ03	MOTU246	MOTU240
Eupseudosoma involuta	BOLD:AAP5111	Split	Eupseudosoma involuta sp. MMZ01	MOTU247	MOTU243
Eupseudosoma involuta	BOLD:AAA1354	Split	Eupseudosoma involuta sp. MMZ02	MOTU248	MOTU244
Idalus lineosus	BOLD:AAA1451	Split	Idalus lineosus sp. MMZ01	MOTU249	MOTU247
Idalus lineosus	BOLD:AAK4120	Split	Idalus lineosus sp. MMZ02	MOTU250	MOTU248
Idalus lineosus	BOLD:ABZ0675	Split	Idalus lineosus sp. MMZ03	MOTU251	MOTU249
Illice sp. ML04	BOLD:ABU6453	Split	Illice sp. ML01	MOTU252	MOTU254
Illice sp. ML04	BOLD:ABA2922	Split	Illice sp. ML04	MOTU253	MOTU255
Ischnocampa lugubris	BOLD:AAI3400	Split	Ischnocampa lugubris sp. MMZ01	MOTU254	MOTU256
Ischnocampa lugubris	BOLD:ABA6855	Split	Ischnocampa lugubris sp. MMZ02	MOTU255	MOTU257
Lophocampa sp. JAT01	BOLD:AAV7357	Split	Lophocampa atrimaculata	MOTU256	MOTU261
Lophocampa sp. JAT01	BOLD:AAA6866	Split	Lophocampa modesta	MOTU257	MOTU262
Lophocampa texta	BOLD:AAA1316	Split	Lophocampa texta sp. MMZ01	MOTU258	MOTU263
Lophocampa texta	BOLD:AAX6627	Split	Lophocampa texta sp. MMZ02	MOTU259	MOTU264
Machadoia xanthosticta	BOLD:AAU3611	Split	Machadoia sp. MMZ01	MOTU260	MOTU266
Machadoia xanthosticta	BOLD:AAU3612	Split	Machadoia xanthosticta	MOTU261	MOTU267
Mesothen desperata	BOLD:AAA1393	Split	Mesothen desperata sp. MMZ01	MOTU262	MOTU274
Mesothen desperata	BOLD:AAU3098	Split	Mesothen desperata sp. MMZ02	MOTU263	MOTU275
Metalobosia diaxantha	BOLD:ABA3541	Split	Metalobosia diaxantha sp. MMZ01	MOTU264	MOTU276
Metalobosia diaxantha	BOLD:AAZ0604	Split	Metalobosia diaxantha sp. MMZ02	MOTU265	MOTU277
Nodozana coresa	BOLD:ABA3313	Split	Nodozana coresa sp. MMZ01	MOTU266	MOTU278
Nodozana coresa	BOLD:ABY9349	Split	Nodozana coresa sp. MMZ02	MOTU267	MOTU279
Pachydota affinis	BOLD:AAZ5088	Split	Pachydota affinis sp. MMZ01	MOTU268	MOTU280
Pachydota affinis	BOLD:AAZ4573	Split	Pachydota affinis sp. MMZ02	MOTU269	MOTU281
Pachydota affinis	BOLD:ACE7572	Split	Pachydota affinis sp. MMZ03	MOTU270	MOTU282
Paracles fusca	BOLD:AAP4838	Split	Paracles fusca sp. MMZ01	MOTU271	MOTU284
Paracles fusca	BOLD:AAU1888	Split	Paracles fusca sp. MMZ02	MOTU272	MOTU285
Paracles fusca	BOLD:AAP4839	Split	Paracles fusca sp. MMZ03	MOTU273	MOTU286
Pelochyta cinerea	BOLD:AAU1239	Split	Pelochyta cinerea sp. MMZ01	MOTU274	MOTU287
Pelochyta cinerea	BOLD:AAP4484	Split	Pelochyta cinerea sp. MMZ02	MOTU275	MOTU288
Poliopastea indistincta	BOLD:AAF1889	Split	Poliopastea indistincta sp. MMZ01	MOTU276	MOTU290
Poliopastea indistincta	BOLD:AAZ3913	Split	Poliopastea indistincta sp. MMZ02	MOTU277	MOTU291
Theages leucophaea	BOLD:AAN0020	Split	Theages leucophaea sp. MMZ01	MOTU278	MOTU295
Theages leucophaea	BOLD:AAA1337	Split	Theages leucophaea sp. MMZ02	MOTU279	MOTU296
Virbia divisa	BOLD:AAP3413	Split	Virbia divisa sp. MMZ01	MOTU280	MOTU300
Virbia divisa	BOLD:AAP3412	Split	Virbia divisa sp. MMZ02	MOTU281	MOTU301
Dysschema amphissa	BOLD:AAP4031	Split	Dysschema amphissa MMZ01	MOTU282	MOTU302
Dysschema amphissa	BOLD:AAV6466	Split	Dysschema amphissa MMZ02	MOTU283	MOTU303
Scaptius sp. ML01	BOLD:AAV4244	Split	Scaptius submarginalis	MOTU284	MOTU304
Scaptius sp. ML01	BOLD:AAV9829	Split	Amaxia kennedyi	MOTU285	MOTU305
Delphyre sp. ML01	BOLD:ACE6701	Split	Prosopidia oviplaga sp. MMZ01	MOTU286	MOTU079
Delphyre sp. ML01	BOLD:AAV9825	Split	Prosopidia oviplaga sp. MMZ02
Arctiinae sp. JAT32	BOLD:AAV1111	No	Leucanopsis suavina	MOTU287	MOTU217
Melese incertus		No	Melese incertus
Melese sp. JAT06		No	Melese incertus
Melese sp. JAT12		No	Melese incertus
Arctiinae sp. JAT30	BOLD:AAP4880	No	Arctiinae sp. JAT18	MOTU288	MOTU219
Symphlebia perflua		No	Symphlebia perflua
Arctiinae sp. JAT32	BOLD:ABU6380	No	Leucanopsis suavina	MOTU289	MOTU220
Arctiinae sp. JAT32		No	Leucanopsis daltoni
Arctiinae sp. JAT34		No	Leucanopsis daltoni
Leucanopsis sp. JAT02		No	Leucanopsis daltoni
Arctiinae sp. JAT21	BOLD:AAG6256	No	Trichromia pinon	MOTU290	MOTU221
Trichromia sp. JAT04		No	Trichromia sp. JAT03
Euchlaenidia transcisa	BOLD:ABZ8190	No	Euchlaenidia transcisa	MOTU291	MOTU241
Euchlaenidia transcisa	BOLD:ABZ2707	No	Euchlaenidia transcisa	MOTU292	MOTU242
Eucereon sp. JAT02	BOLD:AAU2368	No	Eucereon punctatum	MOTU293	MOTU236
Trichromia sp. JAT06		No	Trichromia sp. JAT04
Eucereon sp. JAT02	BOLD:AAM6364	No	Eucereon punctatum	MOTU294	MOTU237
Trichromia sp. JAT06		No	Trichromia sp. JAT04
Trichromia sp. JAT06	BOLD:ABX5277	No	Trichromia sp. JAT04	MOTU295	MOTU299
Pachydota sp. JAT01	BOLD:AAM4816	No	Pachydota sp. JAT01	MOTU296	MOTU283
Phaegoptera fusca		No	Phaegoptera fusca sp. MMZ01
Phaegoptera fusca	BOLD:AAM4814	No	Phaegoptera fusca sp. MMZ01	MOTU297	MOTU289
Phaegoptera fusca	BOLD:ABY6027	No	Phaegoptera fusca sp. MMZ02
Arctiinae sp. JAT32	BOLD:ABU8578	No	Leucanopsis suavina	MOTU298	MOTU218
Elysius superba	BOLD:AAZ3789	No	Elysius superba	MOTU299	MOTU092
Elysius superba	BOLD:AAZ3790	No	Elysius superba	MOTU300	MOTU093
Leucanopsis leucanina	BOLD:AAE7305	No	Leucanopsis leucanina	MOTU301	MOTU137
Leucanopsis leucanina	BOLD:ACH2171	No	Leucanopsis leucanina
Melese chozeba	BOLD:ACE7928	No	Melese chozeba	MOTU302	MOTU146
Melese chozeba	BOLD:ACE7925	No	Melese chozeba
Lophocampa sp. JAT02	Not analysed	Not analysed	Lophocampa sp. JAT01	Not analysed	Not analysed
Marcrocneme sp. JAT01	Not analysed	Not analysed	Macrocneme sp. JAT01	Not analysed	Not analysed
Episcea extravagans	Not analysed	Not analysed	Episcea extravagans	Not analysed	Not analysed
Arctiinae sp. JAT01	Not analysed	Not analysed	Hyaleucerea morosa	Not analysed	Not analysed
Aclytia terra	Not analysed	Not analysed	Aclytia terra	Not analysed	Not analysed
Aclytia terra	Not analysed	Not analysed	Aclytia terra	Not analysed	Not analysed
